# Supplementary material
Source: PubMed Central journal article supplement (PMC2976432)
Supplement: supp_30_23_5473__2.pdf [file supp_30_23_5473__2.pdf]

Table 1, supplement. Relative macroH2A1 content of housekeeping genes in mouse liver.<sup>1</sup>

| Official symbol    | Affymetrix Probe Set | Length | MacroH2A1 counts (Raw) <sup>2</sup> | MacroH2A1 (RPKM) <sup>2</sup> | Starting material counts (Raw) <sup>2</sup> | Starting Material (RPKM) <sup>2</sup> | MacroH2A1 content (macroH2A1 vs SM) <sup>2</sup> | stepup (p-value (MacroH2A1 vs SM)) <sup>2</sup> |
|--------------------|----------------------|--------|-------------------------------------|-------------------------------|---------------------------------------------|---------------------------------------|--------------------------------------------------|-------------------------------------------------|
| MT2A               | V00594_s_at          | 951    | 1                                   | 0.084336                      | 1                                           | 0.08439                               | -1.00064                                         | 1                                               |
| FTL (affy - Ft11)  | M11147_at            | 1944   | 1                                   | 0.041257                      | 1                                           | 0.041283                              | -1.00064                                         | 1                                               |
| GPX1               | Y00433_at            | 1066   | 0                                   | 0                             | 1                                           | 0.075286                              | ?                                                | 0.291999                                        |
| UBC                | M26880_at            | 4510   | 2                                   | 0.035567                      | 1                                           | 0.017795                              | 1.99873                                          | 0.625502                                        |
| RPS29              | U14973_at            | 1464   | 0                                   | 0                             | 1                                           | 0.054819                              | ?                                                | 0.291999                                        |
| TMSB10             | S54005_s_at          | 881    | 0                                   | 0                             | 1                                           | 0.091095                              | ?                                                | 0.291999                                        |
| ZFP36              | M92843_s_at          | 2446   | 0                                   | 0                             | 1                                           | 0.032811                              | ?                                                | 0.291999                                        |
| RPLP1              | M17886_at            | 1229   | 1                                   | 0.065259                      | 1                                           | 0.065301                              | -1.00064                                         | 1                                               |
| RPS28              | U58682_at            | 1472   | 1                                   | 0.054486                      | 2                                           | 0.109041                              | -2.00127                                         | 0.625502                                        |
| RPL28              | U14969_at            | 1584   | 0                                   | 0                             | 2                                           | 0.101331                              | ?                                                | 0.127102                                        |
| RPS23              | D14530_at            | 1612   | 1                                   | 0.049754                      | 2                                           | 0.099571                              | -2.00127                                         | 0.625502                                        |
| H3F3B              | Z48950_at            | 2545   | 3                                   | 0.094542                      | 2                                           | 0.063068                              | 1.49905                                          | 0.716877                                        |
| COX7C              | X16560_at            | 1999   | 1                                   | 0.040122                      | 2                                           | 0.080295                              | -2.00127                                         | 0.625502                                        |
| RPS15              | M32405_at            | 1684   | 3                                   | 0.14288                       | 2                                           | 0.095314                              | 1.49905                                          | 0.716877                                        |
| RPS21              | L04483_s_at          | 1067   | 0                                   | 0                             | 3                                           | 0.225645                              | ?                                                | 0.0586272                                       |
| IFITM2             | X57351_s_at          | 1124   | 1                                   | 0.071355                      | 3                                           | 0.214202                              | -3.00191                                         | 0.364967                                        |
| RPS8               | X67247_rna1_at       | 2298   | 2                                   | 0.069803                      | 3                                           | 0.104771                              | -1.50096                                         | 0.7168                                          |
| FTH1               | L20941_at            | 2391   | 0                                   | 0                             | 3                                           | 0.100696                              | ?                                                | 0.0586272                                       |
| RPL18              | L11566_at            | 2766   | 3                                   | 0.086989                      | 3                                           | 0.087044                              | -1.00064                                         | 1                                               |
| NFKBIA             | M69043_at            | 3240   | 4                                   | 0.099017                      | 3                                           | 0.07431                               | 1.33248                                          | 0.766415                                        |
| NA (affy - Eef1a1) | X03689_s_at          | 3272   | 0                                   | 0                             | 3                                           | 0.073583                              | ?                                                | 0.0586272                                       |
| EEF1A1             | J04617_s_at          | 3272   | 0                                   | 0                             | 3                                           | 0.073583                              | ?                                                | 0.0586272                                       |
| RPS11              | X06617_at            | 2003   | 1                                   | 0.040042                      | 3                                           | 0.120201                              | -3.00191                                         | 0.364967                                        |
| CIRBP              | D78134_at            | 3814   | 3                                   | 0.063086                      | 3                                           | 0.063126                              | -1.00064                                         | 1                                               |
| SUI1 (affy - Eif1) | L26247_at            | 2102   | 3                                   | 0.114467                      | 4                                           | 0.15272                               | -1.33418                                         | 0.765849                                        |
| ATF4               | D90209_at            | 2359   | 0                                   | 0                             | 4                                           | 0.136082                              | ?                                                | 0.0274223                                       |
| OAZ1               | D78361_at            | 2636   | 1                                   | 0.030426                      | 4                                           | 0.121782                              | -4.00255                                         | 0.209488                                        |
| PSMB6              | D29012_at            | 2503   | 3                                   | 0.096129                      | 4                                           | 0.128253                              | -1.33418                                         | 0.765849                                        |
| JUND               | X56681_s_at          | 2879   | 3                                   | 0.083574                      | 4                                           | 0.111503                              | -1.33418                                         | 0.765849                                        |
| GPX4               | X71973_at            | 2931   | 2                                   | 0.054728                      | 4                                           | 0.109525                              | -2.00127                                         | 0.473502                                        |
| RPS25              | M64716_at            | 2694   | 1                                   | 0.029771                      | 4                                           | 0.11916                               | -4.00255                                         | 0.209488                                        |
| ACTG1              | M19283_at            | 2796   | 0                                   | 0                             | 4                                           | 0.114813                              | ?                                                | 0.0274223                                       |
| H2AFZ              | M37583_at            | 2325   | 3                                   | 0.103488                      | 4                                           | 0.138072                              | -1.33418                                         | 0.765849                                        |
| RPL18A             | X80822_at            | 2723   | 0                                   | 0                             | 4                                           | 0.117891                              | ?                                                | 0.0274223                                       |
| RPS26              | X69654_at            | 1978   | 0                                   | 0                             | 5                                           | 0.202868                              | ?                                                | 0.0130744                                       |
| RPS2               | X17206_at            | 1865   | 1                                   | 0.043005                      | 5                                           | 0.21516                               | -5.00318                                         | 0.117737                                        |
| RPS6               | M77232_rna1_at       | 3270   | 1                                   | 0.024527                      | 5                                           | 0.122713                              | -5.00318                                         | 0.117737                                        |
| HSPB1              | Z23090_at            | 1646   | 12                                  | 0.584715                      | 6                                           | 0.292544                              | 1.99873                                          | 0.197144                                        |
| PIM1               | M54915_s_at          | 4416   | 3                                   | 0.054486                      | 6                                           | 0.109041                              | -2.00127                                         | 0.370653                                        |
| CD63               | X62654_rna1_at       | 2954   | 19                                  | 0.515865                      | 6                                           | 0.163009                              | 3.16465                                          | 0.012014                                        |

|                      |                |      |    |          |    |          |          |             |
|----------------------|----------------|------|----|----------|----|----------|----------|-------------|
| RPL10A               | U12404_at      | 2564 | 1  | 0.031281 | 7  | 0.219104 | -7.00446 | 0.0356613   |
| RPL12                | L06505_at      | 2335 | 0  | 0        | 7  | 0.240592 | ?        | 0.00303752  |
| RPL29                | Z49148_s_at    | 2030 | 2  | 0.079018 | 7  | 0.27674  | -3.50223 | 0.115913    |
| CSTB                 | U46692_rna1_at | 1954 | 2  | 0.082092 | 7  | 0.287503 | -3.50223 | 0.115913    |
| NA (affy - Rps27a)   | U49869_rna1_at | 2200 | 1  | 0.036456 | 7  | 0.255355 | -7.00446 | 0.0356613   |
| RPS27A               | S79522_at      | 2200 | 1  | 0.036456 | 7  | 0.255355 | -7.00446 | 0.0356613   |
| PFN1                 | J03191_at      | 2803 | 3  | 0.08584  | 7  | 0.200422 | -2.33482 | 0.249185    |
| RPL13                | X64707_at      | 2892 | 0  | 0        | 7  | 0.194254 | ?        | 0.00303752  |
| JUNB                 | X51345_at      | 1808 | 4  | 0.177441 | 7  | 0.31072  | -1.75111 | 0.424432    |
| RPS18                | X69150_at      | 3644 | 2  | 0.044019 | 7  | 0.154166 | -3.50223 | 0.115913    |
| CFL1                 | X95404_at      | 3578 | 5  | 0.112079 | 7  | 0.15701  | -1.40089 | 0.626696    |
| DDT                  | U49785_at      | 2143 | 2  | 0.074852 | 8  | 0.299597 | -4.00255 | 0.0689737   |
| TPT1                 | X16064_at      | 3047 | 0  | 0        | 8  | 0.210711 | ?        | 0.00148435  |
| UBA52                | X56997_rna1_at | 2103 | 4  | 0.152551 | 8  | 0.305295 | -2.00127 | 0.296547    |
| RPL9                 | U09953_at      | 3069 | 6  | 0.156801 | 8  | 0.2092   | -1.33418 | 0.656367    |
| RPL34                | L38941_at      | 3479 | 1  | 0.023054 | 8  | 0.184546 | -8.00509 | 0.0192898   |
| EEF1B2               | X60489_at      | 2527 | 1  | 0.031739 | 8  | 0.254071 | -8.00509 | 0.0192898   |
| RPS9                 | U14971_at      | 2858 | 4  | 0.112251 | 8  | 0.224645 | -2.00127 | 0.296547    |
| RPL13A               | X56932_at      | 2961 | 1  | 0.027087 | 8  | 0.216831 | -8.00509 | 0.0192898   |
| RPL14                | D87735_at      | 3138 | 3  | 0.076676 | 8  | 0.2046   | -2.66836 | 0.161992    |
| PPIA                 | X52851_rna1_at | 3942 | 2  | 0.040692 | 8  | 0.162871 | -4.00255 | 0.0689737   |
| DUSP1                | X68277_at      | 2882 | 1  | 0.027829 | 8  | 0.222775 | -8.00509 | 0.0192898   |
| RPLP0                | M17885_at      | 4262 | 1  | 0.018818 | 8  | 0.150642 | -8.00509 | 0.0192898   |
| PTMA                 | M26708_s_at    | 3964 | 0  | 0        | 8  | 0.161967 | ?        | 0.00148435  |
| REA (affy - Phb2)    | U72511_at      | 4658 | 3  | 0.051655 | 9  | 0.155065 | -3.00191 | 0.10376     |
| GAPD (Gapdh)         | X01677_f_at    | 3733 | 1  | 0.021485 | 9  | 0.193488 | -9.00573 | 0.0103816   |
| RPL7A                | M36072_at      | 2506 | 0  | 0        | 9  | 0.288225 | ?        | 0.00072551  |
| RPS16                | M60854_at      | 2011 | 4  | 0.15953  | 9  | 0.35917  | -2.25143 | 0.204049    |
| IFITM1               | J04164_at      | 1753 | 28 | 1.28106  | 9  | 0.412031 | 3.10913  | 0.00232928  |
| ATP5G3               | U09813_at      | 2846 | 0  | 0        | 10 | 0.281991 | ?        | 0.000356252 |
| AUP1                 | D25274_at      | 3031 | 1  | 0.026461 | 10 | 0.264779 | -10.0064 | 0.00556151  |
| VDUP1 (affy - Txnip) | S73591_at      | 3902 | 4  | 0.082218 | 10 | 0.205675 | -2.50159 | 0.135671    |
| RPL7                 | X57959_at      | 3111 | 2  | 0.051118 | 10 | 0.255751 | -5.00318 | 0.0236249   |
| ACTB                 | M10277_s_at    | 3610 | 2  | 0.044434 | 10 | 0.222312 | -5.00318 | 0.0236249   |
| ACTB                 | X00351_f_at    | 3610 | 2  | 0.044434 | 10 | 0.222312 | -5.00318 | 0.0236249   |
| RPS14                | M13934_cds2_at | 3951 | 2  | 0.040599 | 10 | 0.203125 | -5.00318 | 0.0236249   |
| PSME1                | L07633_at      | 3035 | 0  | 0        | 10 | 0.26443  | ?        | 0.000356252 |
| RPL19                | X63527_at      | 3784 | 0  | 0        | 11 | 0.233298 | ?        | 0.000174724 |
| GPS2                 | U28963_at      | 2401 | 2  | 0.066808 | 11 | 0.36768  | -5.5035  | 0.0135432   |
| RPS17                | M18000_at      | 2503 | 1  | 0.032043 | 11 | 0.352697 | -11.007  | 0.00296548  |
| HMG17 (affy - Hmgn2) | X13546_rna1_at | 3254 | 2  | 0.049295 | 11 | 0.271297 | -5.5035  | 0.0135432   |
| RPL31                | X15940_at      | 4059 | 2  | 0.039519 | 11 | 0.217492 | -5.5035  | 0.0135432   |
| RPL23                | X55954_at      | 4915 | 3  | 0.048954 | 11 | 0.179613 | -3.669   | 0.0397814   |
| EIF4A2               | D30655_at      | 6655 | 2  | 0.024103 | 12 | 0.144711 | -6.00382 | 0.007706    |
| GSTP1                | M24485_s_at    | 2503 | 1  | 0.032043 | 12 | 0.38476  | -12.0076 | 0.0015759   |

|                          |                  |      |    |          |    |          |          |             |
|--------------------------|------------------|------|----|----------|----|----------|----------|-------------|
| RPL17                    | X53777_at        | 2906 | 0  | 0        | 12 | 0.331402 | ?        | 8.62E-05    |
| EIF4A1                   | D13748_at        | 5489 | 6  | 0.08767  | 12 | 0.175452 | -2.00127 | 0.19631     |
| RPL27A                   | U14968_at        | 3176 | 3  | 0.075759 | 12 | 0.303229 | -4.00255 | 0.0241069   |
| RPL8                     | Z28407_at        | 2249 | 2  | 0.071324 | 12 | 0.428214 | -6.00382 | 0.007706    |
| ATP5G1                   | D13118_at        | 2840 | 1  | 0.028241 | 12 | 0.339104 | -12.0076 | 0.0015759   |
| PSMB5                    | X95586_at        | 3877 | 5  | 0.103435 | 12 | 0.248402 | -2.40153 | 0.114198    |
| AGPAT1                   | U56417_at        | 4436 | 4  | 0.072321 | 12 | 0.2171   | -3.00191 | 0.0578155   |
| COX6A1                   | X15341_at        | 3303 | 3  | 0.072846 | 13 | 0.315867 | -4.33609 | 0.0144327   |
| RPL35                    | U12465_at        | 3552 | 7  | 0.158059 | 13 | 0.293724 | -1.85833 | 0.22238     |
| UQCRB                    | M26730_s_at      | 4731 | 3  | 0.050858 | 13 | 0.220526 | -4.33609 | 0.0144327   |
| SNRPD2                   | U15008_at        | 2890 | 0  | 0        | 13 | 0.361007 | ?        | 4.26E-05    |
| RPL11                    | X79234_at        | 3425 | 3  | 0.070251 | 13 | 0.304616 | -4.33609 | 0.0144327   |
| SRP14                    | U07857_at        | 3855 | 2  | 0.04161  | 13 | 0.270638 | -6.50414 | 0.00436232  |
| RPS3A                    | M84711_at        | 4730 | 2  | 0.033913 | 13 | 0.220573 | -6.50414 | 0.00436232  |
| COX8 (affy - Cox8a)      | J04823_rna1_at   | 2460 | 7  | 0.228221 | 13 | 0.424109 | -1.85833 | 0.22238     |
| ALDOA                    | X12447_at        | 3949 | 5  | 0.101549 | 13 | 0.264196 | -2.60166 | 0.0760715   |
| HNRPA1 (Affy - Hnrnpa1)  | X12671_rna1_at   | 4525 | 1  | 0.017725 | 13 | 0.230565 | -13.0083 | 0.00083418  |
| PFDN5                    | D89667_at        | 5375 | 9  | 0.134294 | 13 | 0.194104 | -1.44536 | 0.456097    |
| DDX5                     | X15729_s_at      | 8140 | 1  | 0.009853 | 14 | 0.13803  | -14.0089 | 0.000438803 |
| PSMB4                    | D26600_at        | 2636 | 2  | 0.060852 | 14 | 0.426238 | -7.00446 | 0.00244495  |
| RPL35A                   | X52966_at        | 3676 | 2  | 0.043636 | 14 | 0.305648 | -7.00446 | 0.00244495  |
| HSPCA (Affy - Hsp90aa1)  | X15183_at        | 5361 | 2  | 0.029921 | 14 | 0.209581 | -7.00446 | 0.00244495  |
| RPL37A                   | L06499_at        | 2553 | 3  | 0.094246 | 14 | 0.440095 | -4.66964 | 0.00856826  |
| LAMR1 (Affy - Rpsa)      | M14199_s_at      | 4605 | 1  | 0.017417 | 14 | 0.243988 | -14.0089 | 0.000438803 |
| LAMR1                    | U43901_rna1_s_at | 4605 | 1  | 0.017417 | 14 | 0.243988 | -14.0089 | 0.000438803 |
| ATP6S14 (affy - ATP6V1F) | D49400_at        | 2728 | 4  | 0.1176   | 14 | 0.411863 | -3.50223 | 0.0228392   |
| HYAL2                    | AJ000099_s_at    | 3617 | 2  | 0.044348 | 14 | 0.310634 | -7.00446 | 0.00244495  |
| HMG1 (Affy - Hmgb1)      | D63874_at        | 5811 | 0  | 0        | 14 | 0.193351 | ?        | 2.10E-05    |
| HNRPU (Affy - Rpl24)     | D13413_rna1_s_at | 5164 | 1  | 0.015531 | 15 | 0.233117 | -15.0096 | 0.000230139 |
| RPL21                    | U25789_at        | 4142 | 2  | 0.038727 | 15 | 0.290637 | -7.50478 | 0.00136441  |
| RPL3                     | X73460_at        | 5627 | 1  | 0.014253 | 15 | 0.213936 | -15.0096 | 0.000230139 |
| POLR2L                   | U37690_at        | 3295 | 1  | 0.024341 | 15 | 0.365347 | -15.0096 | 0.000230139 |
| SURF1                    | Z35093_at        | 3154 | 4  | 0.101717 | 15 | 0.38168  | -3.75239 | 0.0140983   |
| COX7A2                   | X15822_at        | 4614 | 1  | 0.017383 | 15 | 0.260905 | -15.0096 | 0.000230139 |
| UBCH10 (affy - Ube2c)    | U73379_at        | 2975 | 22 | 0.593101 | 16 | 0.431621 | 1.37413  | 0.390165    |
| MACS (affy - Marcks)     | D10522_at        | 5685 | 16 | 0.225727 | 16 | 0.22587  | -1.00064 | 1           |
| CES2                     | Y09616_at        | 7384 | 29 | 0.314992 | 16 | 0.173899 | 1.81135  | 0.0712883   |
| RPL4                     | D23660_at        | 5177 | 1  | 0.015492 | 17 | 0.263536 | -17.0108 | 6.36E-05    |
| GPS1                     | U20285_at        | 4589 | 5  | 0.087387 | 17 | 0.297304 | -3.40217 | 0.0131378   |
| XBP1                     | M31627_at        | 4907 | 4  | 0.065379 | 17 | 0.278037 | -4.25271 | 0.00523543  |
| HSPCB (Affy - Hsp90ab1)  | J04988_at        | 5485 | 2  | 0.029245 | 17 | 0.248738 | -8.50541 | 0.000416991 |
| DHPS                     | U79262_at        | 3406 | 5  | 0.117739 | 17 | 0.400566 | -3.40217 | 0.0131378   |
| SEPW1                    | U67171_at        | 5165 | 5  | 0.077641 | 17 | 0.264148 | -3.40217 | 0.0131378   |

|                              |                  |       |    |          |    |          |          |             |
|------------------------------|------------------|-------|----|----------|----|----------|----------|-------------|
| AES                          | U04241_at        | 6806  | 7  | 0.08249  | 17 | 0.200459 | -2.43012 | 0.0543154   |
| FY (Darc)                    | X85785_rna1_at   | 1619  | 12 | 0.594467 | 18 | 0.892268 | -1.50096 | 0.32706     |
| RPL27                        | L19527_at        | 3353  | 0  | 0        | 18 | 0.430833 | ?        | 1.28E-06    |
| LAP18 (affy - Stmn1)         | M31303_rna1_at   | 5524  | 19 | 0.275863 | 18 | 0.26151  | 1.05488  | 0.923342    |
| PBP (affy - Pbp1, aka Pebp1) | X75252_at        | 4915  | 4  | 0.065272 | 19 | 0.310241 | -4.75302 | 0.00187651  |
| TRAF4                        | X80200_at        | 7129  | 11 | 0.123753 | 19 | 0.213892 | -1.72837 | 0.182629    |
| RPL6                         | X69391_at        | 4741  | 0  | 0        | 19 | 0.321628 | ?        | 6.36E-07    |
| NA (affy - Atp5b)            | M19483_at        | 7083  | 2  | 0.022647 | 20 | 0.226612 | -10.0064 | 6.81E-05    |
| MOV34-34KD (affy - Cops6)    | U70735_at        | 2884  | 7  | 0.194669 | 20 | 0.55655  | -2.85896 | 0.0161509   |
| BTG2                         | U72649_at        | 4292  | 1  | 0.018687 | 20 | 0.373973 | -20.0127 | 9.03E-06    |
| LGALS1                       | J04456_at        | 3742  | 22 | 0.471533 | 20 | 0.428939 | 1.0993   | 0.817964    |
| CD151                        | D29963_at        | 4121  | 13 | 0.253008 | 20 | 0.389491 | -1.53944 | 0.274363    |
| HNRPK (Affy - Hnrnpk)        | X72727_at        | 10567 | 2  | 0.01518  | 20 | 0.151897 | -10.0064 | 6.81E-05    |
| RPL38                        | Z26876_at        | 3790  | 2  | 0.042324 | 20 | 0.423507 | -10.0064 | 6.81E-05    |
| HNRPF (Affy - Hnrnpf)        | L28010_at        | 8329  | 3  | 0.028888 | 20 | 0.192711 | -6.67091 | 0.000319139 |
| B2M                          | S82297_at        | 5397  | 3  | 0.044582 | 21 | 0.312274 | -7.00446 | 0.000179997 |
| NA (affy - B2m)              | J00105_s_at      | 5397  | 3  | 0.044582 | 21 | 0.312274 | -7.00446 | 0.000179997 |
| RPL32                        | X03342_at        | 3231  | 2  | 0.049646 | 21 | 0.521617 | -10.5067 | 3.70E-05    |
| DAZAP2                       | D31767_at        | 5101  | 3  | 0.047169 | 21 | 0.330395 | -7.00446 | 0.000179997 |
| HINT (Affy - Hint1)          | U51004_at        | 4060  | 3  | 0.059264 | 21 | 0.41511  | -7.00446 | 0.000179997 |
| LDHA                         | X02152_at        | 8546  | 1  | 0.009385 | 22 | 0.2066   | -22.014  | 2.45E-06    |
| CSNK2B                       | X57152_rna1_s_at | 5254  | 6  | 0.091591 | 22 | 0.336049 | -3.669   | 0.00300671  |
| CSNK2B                       | M30448_s_at      | 5254  | 6  | 0.091591 | 22 | 0.336049 | -3.669   | 0.00300671  |
| RPS7                         | Z25749_rna1_at   | 5108  | 2  | 0.031403 | 23 | 0.361365 | -11.5073 | 1.08E-05    |
| NA (Affy - Nefl)             | U57341_r_at      | 3855  | 32 | 0.665762 | 23 | 0.478821 | 1.39042  | 0.279125    |
| PIN (Affy - Dynll1)          | U32944_at        | 3880  | 11 | 0.227381 | 23 | 0.475736 | -2.09224 | 0.0533411   |
| RPS24                        | M31520_rna1_s_at | 5467  | 4  | 0.058682 | 23 | 0.337636 | -5.75366 | 0.000221429 |
| RPS19                        | M81757_at        | 5090  | 6  | 0.094542 | 23 | 0.362643 | -3.83577 | 0.00187481  |
| ATP5A1                       | D14710_at        | 9102  | 7  | 0.061681 | 23 | 0.202797 | -3.28781 | 0.00440235  |
| RPS5                         | U14970_at        | 4376  | 2  | 0.036656 | 24 | 0.440153 | -12.0076 | 5.81E-06    |
| YWHAH                        | D78577_s_at      | 9152  | 7  | 0.061344 | 25 | 0.219227 | -3.5737  | 0.00177056  |
| NDUFA4                       | U94586_at        | 7075  | 2  | 0.022672 | 25 | 0.283585 | -12.508  | 3.13E-06    |
| AAMP                         | M95627_at        | 4821  | 5  | 0.083181 | 25 | 0.416172 | -5.00318 | 0.000247944 |
| SQSTM1                       | U46751_at        | 10640 | 9  | 0.067841 | 25 | 0.188568 | -2.77955 | 0.00806522  |
| MAZ                          | M94046_at        | 4344  | 3  | 0.055389 | 25 | 0.46187  | -8.33864 | 1.76E-05    |
| SSB                          | X14684_s_at      | 10286 | 4  | 0.031189 | 26 | 0.20286  | -6.50414 | 4.23E-05    |
| UQCRH                        | Y00764_at        | 8107  | 8  | 0.079145 | 26 | 0.257385 | -3.25207 | 0.00255774  |
| MGP                          | X53331_at        | 3372  | 32 | 0.761124 | 26 | 0.618807 | 1.22999  | 0.49701     |
| RPS10                        | U14972_at        | 4815  | 6  | 0.099942 | 26 | 0.433358 | -4.33609 | 0.000431993 |
| SET                          | M93651_at        | 9753  | 11 | 0.090458 | 26 | 0.213946 | -2.36514 | 0.0186348   |
| C1QBP                        | M69039_at        | 5182  | 5  | 0.077387 | 27 | 0.418154 | -5.40344 | 8.63E-05    |
| GNB2L1                       | M24194_at        | 5883  | 1  | 0.013633 | 27 | 0.368328 | -27.0172 | 9.20E-08    |
| COX4 (Affy - Cox4i1)         | U90915_at        | 5921  | 3  | 0.040637 | 27 | 0.365964 | -9.00573 | 5.40E-06    |

|                         |                |       |    |          |    |          |          |             |
|-------------------------|----------------|-------|----|----------|----|----------|----------|-------------|
| MLF2                    | U57342_at      | 4761  | 3  | 0.050538 | 27 | 0.45513  | -9.00573 | 5.40E-06    |
| SOD1                    | X02317_at      | 5584  | 6  | 0.086179 | 27 | 0.38805  | -4.50286 | 0.000262235 |
| PGAM1                   | J04173_at      | 6796  | 3  | 0.035405 | 28 | 0.330654 | -9.33928 | 2.99E-06    |
| FKBP4                   | M88279_at      | 8526  | 12 | 0.112883 | 29 | 0.272975 | -2.4182  | 0.0108908   |
| COX6C                   | X13238_at      | 6272  | 3  | 0.038363 | 29 | 0.371075 | -9.67282 | 1.64E-06    |
| BRD2                    | S78771_s_at    | 8366  | 3  | 0.028761 | 29 | 0.278195 | -9.67282 | 1.64E-06    |
| ILK                     | U40282_at      | 6202  | 6  | 0.077591 | 30 | 0.388203 | -5.00318 | 5.63E-05    |
| CLIC1                   | U93205_at      | 8478  | 11 | 0.104062 | 31 | 0.293453 | -2.81998 | 0.00271262  |
| CST3                    | M27891_at      | 3738  | 3  | 0.064369 | 32 | 0.687037 | -10.6735 | 2.69E-07    |
| VIM                     | Z19554_s_at    | 8517  | 54 | 0.508511 | 33 | 0.310954 | 1.63532  | 0.0349234   |
| RPS3                    | X55715_at      | 5815  | 3  | 0.041378 | 33 | 0.455443 | -11.007  | 1.46E-07    |
| NPM1                    | M23613_at      | 10547 | 1  | 0.007604 | 34 | 0.258714 | -34.0216 | 8.89E-10    |
| HSPD1                   | M22382_at      | 10100 | 5  | 0.039705 | 34 | 0.270164 | -6.80433 | 1.86E-06    |
| H3F3A                   | M11353_at      | 11037 | 13 | 0.094468 | 35 | 0.254499 | -2.69402 | 0.00203544  |
| EIF3S5 (Affy - Eif3f)   | U94855_at      | 7529  | 10 | 0.106526 | 36 | 0.383738 | -3.60229 | 0.000145671 |
| FCGRT                   | U12255_at      | 10831 | 16 | 0.11848  | 36 | 0.266749 | -2.25143 | 0.00780315  |
| FUS                     | X71428_at      | 14554 | 11 | 0.060618 | 36 | 0.198513 | -3.27481 | 0.000327962 |
| QARS                    | X76013_at      | 6464  | 9  | 0.111669 | 36 | 0.446962 | -4.00255 | 5.97E-05    |
| SLC25A3                 | X60036_at      | 7387  | 4  | 0.04343  | 37 | 0.401979 | -9.25589 | 7.37E-08    |
| ATP5G2                  | X69908_rna1_at | 8181  | 7  | 0.068625 | 38 | 0.372775 | -5.43203 | 2.67E-06    |
| AZF1 (Affy - Atp5o)     | S77356_at      | 6409  | 6  | 0.075085 | 39 | 0.488364 | -6.50414 | 4.45E-07    |
| TAGLN2                  | D21261_at      | 7131  | 52 | 0.584852 | 39 | 0.438918 | 1.33248  | 0.219248    |
| EEF1G                   | M55409_s_at    | 11141 | 11 | 0.079188 | 40 | 0.288141 | -3.63868 | 5.48E-05    |
| Isg20                   | U88964_at      | 6163  | 32 | 0.416439 | 40 | 0.52088  | -1.2508  | 0.40492     |
| GLUL                    | X59834_at      | 9771  | 17 | 0.139541 | 40 | 0.328542 | -2.35444 | 0.00327257  |
| PSMD8                   | D38047_at      | 6488  | 6  | 0.072857 | 41 | 0.498173 | -6.83768 | 1.46E-07    |
| EEF2                    | X51466_at      | 5878  | 32 | 0.43663  | 41 | 0.559788 | -1.28207 | 0.348447    |
| ARL6IP (Affy - Arl6ip1) | D31885_at      | 10736 | 9  | 0.067235 | 42 | 0.313961 | -4.66964 | 3.12E-06    |
| NEDD8                   | D23662_at      | 9641  | 5  | 0.041595 | 42 | 0.34962  | -8.40535 | 1.92E-08    |
| SSR2                    | X74104_at      | 8744  | 4  | 0.03669  | 44 | 0.403843 | -11.007  | 1.10E-09    |
| CPT1B                   | U62317_rna3_at | 9459  | 25 | 0.211977 | 45 | 0.381801 | -1.80115 | 0.0238683   |
| ECHS1                   | D13900_at      | 10702 | 8  | 0.059954 | 46 | 0.344955 | -5.75366 | 1.26E-07    |
| RPA2                    | J05249_at      | 10388 | 8  | 0.061766 | 46 | 0.355382 | -5.75366 | 1.26E-07    |
| GSTTLp28 (Affy - Gsto1) | U90313_at      | 9801  | 10 | 0.081832 | 48 | 0.393043 | -4.80306 | 4.36E-07    |
| PABPC1                  | Z48501_s_at    | 13316 | 11 | 0.066254 | 48 | 0.289292 | -4.36641 | 1.22E-06    |
| NA (Affy - Pabpc1)      | U68105_s_at    | 13316 | 11 | 0.066254 | 48 | 0.289292 | -4.36641 | 1.22E-06    |
| ERH                     | D85758_at      | 9840  | 9  | 0.073357 | 48 | 0.391486 | -5.33673 | 1.43E-07    |
| PSMC1                   | L02426_at      | 11035 | 13 | 0.094485 | 49 | 0.356364 | -3.77163 | 4.91E-06    |
| PSMD2                   | D78151_at      | 11762 | 8  | 0.054551 | 49 | 0.334337 | -6.1289  | 2.49E-08    |
| CCT4                    | U38846_at      | 12745 | 10 | 0.062929 | 49 | 0.30855  | -4.90312 | 2.62E-07    |
| CLU                     | M63379_at      | 13064 | 41 | 0.25171  | 49 | 0.301016 | -1.19588 | 0.461875    |
| CAPN4 (Affy - Capns1)   | X04106_at      | 8108  | 8  | 0.079135 | 50 | 0.49491  | -6.25398 | 1.45E-08    |
| ENO1                    | M14328_s_at    | 11678 | 9  | 0.061811 | 50 | 0.343614 | -5.55909 | 4.98E-08    |
| G10 (Affy - Bud31)      | U11861_at      | 7679  | 18 | 0.188001 | 51 | 0.53301  | -2.83514 | 9.42E-05    |
| TEGT (Affy - Tmbim6)    | X75861_at      | 16832 | 10 | 0.047649 | 51 | 0.243167 | -5.10325 | 9.39E-08    |

|                           |                  |       |     |          |    |          |          |             |
|---------------------------|------------------|-------|-----|----------|----|----------|----------|-------------|
| PSMB3                     | D26598_at        | 10068 | 8   | 0.063729 | 52 | 0.414505 | -6.50414 | 4.83E-09    |
| MDH1                      | D55654_at        | 15244 | 13  | 0.068397 | 52 | 0.273762 | -4.00255 | 1.20E-06    |
| HNRPL (Affy - Hnrnpl)     | X16135_at        | 11378 | 8   | 0.056392 | 52 | 0.366781 | -6.50414 | 4.83E-09    |
| SEC61B                    | L25085_at        | 8574  | 7   | 0.06548  | 53 | 0.496092 | -7.57625 | 6.86E-10    |
| CD164                     | D14043_at        | 11544 | 9   | 0.062529 | 54 | 0.375411 | -6.00382 | 5.87E-09    |
| PSMD7                     | D50063_at        | 8103  | 1   | 0.009898 | 54 | 0.534832 | -54.0344 | 1.41E-15    |
| KIAA0106 (Affy - prdx6)   | D14662_at        | 11056 | 5   | 0.036271 | 54 | 0.391981 | -10.8069 | 1.55E-11    |
| RER1                      | AJ001421_at      | 12187 | 10  | 0.065811 | 54 | 0.355604 | -5.40344 | 1.97E-08    |
| CALM2                     | M19311_s_at      | 13536 | 14  | 0.082953 | 54 | 0.320164 | -3.8596  | 1.17E-06    |
| TXN Txn1                  | X77584_at        | 13040 | 10  | 0.061506 | 54 | 0.332342 | -5.40344 | 1.97E-08    |
| SCN1B                     | L10338_s_at      | 10423 | 46  | 0.353963 | 55 | 0.423486 | -1.19641 | 0.431025    |
| PRDX1                     | X67951_at        | 14403 | 3   | 0.016706 | 56 | 0.312036 | -18.6786 | 8.22E-14    |
| EIF4G2                    | U73824_at        | 15047 | 7   | 0.037311 | 56 | 0.298681 | -8.00509 | 1.23E-10    |
| UPK1A                     | AC002115_cds1_at | 9644  | 45  | 0.374238 | 57 | 0.474337 | -1.26747 | 0.288888    |
| KIAA0111 (Affy - Eif4a3)  | D21853_at        | 11682 | 6   | 0.041193 | 58 | 0.398456 | -9.67282 | 7.89E-12    |
| NACA                      | X80909_at        | 13293 | 5   | 0.030168 | 59 | 0.356204 | -11.8075 | 7.51E-13    |
| ARF4                      | M36341_at        | 19063 | 7   | 0.029451 | 62 | 0.261018 | -8.86278 | 3.82E-12    |
| CD3E                      | M23323_s_at      | 10849 | 160 | 1.18283  | 63 | 0.466037 | 2.53807  | 1.14E-10    |
| S100A10                   | M38591_at        | 9530  | 16  | 0.134654 | 63 | 0.530539 | -3.94001 | 1.05E-07    |
| TCFL1 (Affy - Vps72)      | D43642_at        | 12011 | 13  | 0.086808 | 63 | 0.42095  | -4.84924 | 5.45E-09    |
| BECN1                     | L38932_at        | 14002 | 9   | 0.051552 | 63 | 0.361094 | -7.00446 | 4.17E-11    |
| SON                       | X63753_at        | 15496 | 10  | 0.051758 | 63 | 0.32628  | -6.30401 | 1.58E-10    |
| UBE2D3                    | U39318_at        | 28421 | 8   | 0.022576 | 64 | 0.180722 | -8.00509 | 5.61E-12    |
| NCL                       | M60858_rna1_at   | 14738 | 8   | 0.043536 | 65 | 0.353952 | -8.13017 | 3.16E-12    |
| SNURF                     | J04615_at        | 22656 | 23  | 0.081421 | 66 | 0.233792 | -2.87139 | 6.62E-06    |
| NA (Affy - Rps15a)        | X62691_at        | 11773 | 9   | 0.061312 | 68 | 0.463544 | -7.56037 | 2.50E-12    |
| HNRPC (Affy - Hnrnpc)     | M16342_at        | 30650 | 13  | 0.034018 | 69 | 0.180671 | -5.31107 | 2.49E-10    |
| NA (Affy - Vdac2)         | L08666_at        | 14320 | 10  | 0.056008 | 69 | 0.386701 | -6.90439 | 5.83E-12    |
| ATP5F1                    | X60221_at        | 17387 | 9   | 0.041516 | 70 | 0.323104 | -7.78273 | 8.06E-13    |
| ZNF162 (Affy - Sf1)       | L49380_at        | 14350 | 11  | 0.06148  | 71 | 0.397078 | -6.45866 | 7.37E-12    |
| GUSB                      | M15182_at        | 13809 | 33  | 0.191666 | 72 | 0.418446 | -2.18321 | 0.000214439 |
| KIAA0063 (Affy - Josd1)   | D31884_at        | 13624 | 14  | 0.082417 | 73 | 0.430019 | -5.2176  | 9.80E-11    |
| LGALS3                    | M57710_at        | 12309 | 143 | 0.931765 | 74 | 0.482479 | 1.9312   | 4.94E-06    |
| NA (Affy - Arf1)          | M84332_at        | 16752 | 12  | 0.057452 | 76 | 0.364096 | -6.33737 | 1.77E-12    |
| NAP1L1                    | M86667_at        | 17529 | 26  | 0.118962 | 79 | 0.361692 | -3.0404  | 2.70E-07    |
| DCTN-50 (Affy - Dctn2)    | U50733_at        | 15410 | 10  | 0.052046 | 79 | 0.411428 | -7.90503 | 2.08E-14    |
| PCBP2                     | X78136_at        | 29429 | 16  | 0.043605 | 81 | 0.220892 | -5.06572 | 1.50E-11    |
| DIA1 (Affy - CYB5R3)      | M28713_at        | 18708 | 29  | 0.124327 | 81 | 0.347478 | -2.79488 | 9.17E-07    |
| ESD                       | M13450_at        | 18100 | 13  | 0.057605 | 82 | 0.363584 | -6.31171 | 2.47E-13    |
| EEF1D                     | Z21507_at        | 14542 | 18  | 0.099275 | 82 | 0.452542 | -4.55846 | 7.58E-11    |
| NSEP1 (Affy - Ybx1)       | J03827_at        | 17188 | 12  | 0.055995 | 83 | 0.387545 | -6.92107 | 3.77E-14    |
| NDUFV2                    | M22538_at        | 22698 | 19  | 0.067137 | 83 | 0.293468 | -4.3712  | 1.26E-10    |
| LOC55967 (Affy - Ndufa12) | U34343_at        | 21941 | 23  | 0.084075 | 83 | 0.303593 | -3.61099 | 4.80E-09    |
| KIAA0253 (Affy - Ncstn)   | D87442_at        | 16737 | 13  | 0.062296 | 85 | 0.407578 | -6.54262 | 4.80E-14    |

|                          |                  |       |     |          |     |          |          |             |
|--------------------------|------------------|-------|-----|----------|-----|----------|----------|-------------|
| FNTA                     | L10413_at        | 16881 | 20  | 0.095022 | 86  | 0.408855 | -4.30274 | 7.85E-11    |
| KIAA0164 (Affy - Bclaf1) | D79986_at        | 30034 | 6   | 0.016023 | 88  | 0.235147 | -14.676  | 8.95E-20    |
| FUCA1                    | M29877_at        | 19576 | 23  | 0.094232 | 88  | 0.360768 | -3.82852 | 4.91E-10    |
| COMT (Comt1)             | Z26491_s_at      | 19836 | 15  | 0.06065  | 88  | 0.356039 | -5.8704  | 1.21E-13    |
| ATOX1                    | U70660_at        | 14497 | 25  | 0.13831  | 91  | 0.503771 | -3.64232 | 7.00E-10    |
| DVL3                     | D86963_at        | 15125 | 17  | 0.090146 | 91  | 0.482854 | -5.35635 | 2.68E-13    |
| LAMP1                    | J04182_at        | 16205 | 14  | 0.06929  | 91  | 0.450673 | -6.50414 | 6.69E-15    |
| HE1 (Affy - Npc2)        | X67698_at        | 18555 | 30  | 0.129674 | 92  | 0.397921 | -3.06862 | 2.19E-08    |
| CD81                     | M33680_at        | 15182 | 29  | 0.153201 | 93  | 0.491613 | -3.20894 | 6.95E-09    |
| YWHAQ                    | X56468_at        | 27109 | 20  | 0.059171 | 94  | 0.278281 | -4.70299 | 1.56E-12    |
| FMOD                     | U05291_at        | 10764 | 153 | 1.14002  | 94  | 0.700848 | 1.62662  | 0.000301571 |
| ARHGDI8                  | L20688_at        | 18010 | 162 | 0.72143  | 95  | 0.42333  | 1.70418  | 5.23E-05    |
| ARHA (Affy - Rhoa)       | L25080_at        | 31735 | 13  | 0.032855 | 96  | 0.242774 | -7.38932 | 1.06E-16    |
| PTP4A2                   | U14603_at        | 29526 | 21  | 0.057044 | 97  | 0.263655 | -4.62199 | 9.89E-13    |
| NEDD5 (Affy - Sept2)     | D63878_at        | 30671 | 20  | 0.052299 | 97  | 0.253813 | -4.85309 | 3.46E-13    |
| SNRP20 (Affy - Snrnp70)  | X04654_s_at      | 19195 | 25  | 0.104459 | 99  | 0.41392  | -3.96252 | 1.78E-11    |
| CCR9                     | U45982_at        | 16248 | 33  | 0.162895 | 99  | 0.488995 | -3.00191 | 1.03E-08    |
| GNAS1 (Affy - GNAS)      | M21142_cds2_s_at | 18830 | 17  | 0.072409 | 103 | 0.438992 | -6.06268 | 4.69E-16    |
| MLN51 (Affy - Casc3)     | X80199_at        | 24001 | 20  | 0.066833 | 104 | 0.347755 | -5.20331 | 9.77E-15    |
| PSD                      | X99688_at        | 15071 | 218 | 1.16013  | 105 | 0.559135 | 2.07487  | 5.82E-10    |
| SF3B2                    | U41371_at        | 21534 | 21  | 0.078215 | 106 | 0.395049 | -5.05083 | 1.07E-14    |
| GDI2                     | D13988_at        | 28188 | 11  | 0.031298 | 106 | 0.301794 | -9.6425  | 1.52E-20    |
| YWHAZ                    | M86400_at        | 23476 | 14  | 0.046253 | 110 | 0.363651 | -7.86214 | 1.63E-19    |
| PSAP                     | J03077_s_at      | 24973 | 19  | 0.061021 | 110 | 0.353502 | -5.79316 | 1.32E-16    |
| SARS                     | X91257_at        | 18559 | 18  | 0.077788 | 111 | 0.479996 | -6.17059 | 2.23E-17    |
| CD34                     | S53911_at        | 22473 | 113 | 0.403284 | 111 | 0.396398 | 1.01737  | 0.948223    |
| EIF3S6 (Affy - Eif3e)    | U62962_at        | 32698 | 17  | 0.041699 | 111 | 0.27244  | -6.53357 | 6.13E-18    |
| KARS                     | D31890_at        | 17867 | 26  | 0.116712 | 111 | 0.498587 | -4.27195 | 1.54E-13    |
| WBSCR1 (Affy - EIF4H)    | D26068_at        | 19454 | 13  | 0.053595 | 111 | 0.457914 | -8.5439  | 2.02E-20    |
| PTPN6                    | X62055_at        | 17993 | 50  | 0.222874 | 115 | 0.512937 | -2.30146 | 6.35E-07    |
| CCNI                     | D50310_at        | 24564 | 23  | 0.075097 | 117 | 0.382258 | -5.09019 | 3.54E-16    |
| ATIC                     | D82348_at        | 22249 | 38  | 0.136983 | 117 | 0.422032 | -3.08091 | 2.18E-10    |
| EIF3S8 (Affy - EIF3C)    | U46025_at        | 19457 | 21  | 0.086564 | 118 | 0.486716 | -5.62263 | 2.13E-17    |
| CANX                     | L10284_at        | 31718 | 7   | 0.0177   | 120 | 0.30363  | -17.1538 | 1.39E-27    |
| LDHB                     | X13794_rna1_at   | 17696 | 165 | 0.747828 | 122 | 0.553292 | 1.3516   | 0.0170072   |
| ADF (Affy - Dstn)        | S65738_at        | 27994 | 26  | 0.074491 | 122 | 0.349755 | -4.69529 | 7.10E-16    |
| OS-9 (Affy says OS9)     | U41635_at        | 26902 | 33  | 0.098384 | 130 | 0.387818 | -3.9419  | 1.31E-14    |
| CAP (Affy - CAP1)        | L12168_at        | 26655 | 36  | 0.108322 | 131 | 0.394423 | -3.64121 | 1.12E-13    |
| CLTA                     | M20471_at        | 20205 | 12  | 0.047634 | 132 | 0.524306 | -11.007  | 1.56E-26    |
| TCEA1                    | M81601_at        | 39580 | 23  | 0.046606 | 132 | 0.26765  | -5.74278 | 1.44E-19    |
| AARS                     | D32050_at        | 22905 | 14  | 0.049022 | 133 | 0.466005 | -9.50605 | 2.62E-25    |
| FKBP1A                   | M34539_at        | 19194 | 18  | 0.075214 | 136 | 0.568647 | -7.56037 | 2.21E-23    |
| HDAC1                    | U50079_s_at      | 26544 | 24  | 0.072517 | 137 | 0.414213 | -5.71197 | 3.42E-20    |
| ARF3                     | M74491_at        | 25494 | 26  | 0.081795 | 137 | 0.431273 | -5.27259 | 3.54E-19    |
| ATP5C1                   | D16562_at        | 24480 | 22  | 0.072078 | 141 | 0.46225  | -6.41317 | 3.29E-22    |

|                                            |                  |        |      |          |     |          |          |             |
|--------------------------------------------|------------------|--------|------|----------|-----|----------|----------|-------------|
| SSP29 (Affy - Anp32b)                      | U70439_s_at      | 21408  | 19   | 0.071182 | 142 | 0.532331 | -7.47844 | 3.15E-24    |
| PAX6                                       | M93650_at        | 20626  | 217  | 0.843797 | 142 | 0.552513 | 1.5272   | 0.000136929 |
| DDB1                                       | U32986_s_at      | 24198  | 23   | 0.076233 | 146 | 0.48422  | -6.35187 | 7.92E-23    |
| ARHGAP1                                    | U02570_at        | 22202  | 22   | 0.079474 | 147 | 0.531367 | -6.68607 | 1.23E-23    |
| TMP21 (Affy - Tmed10)                      | U61734_s_at      | 34105  | 36   | 0.08466  | 148 | 0.348268 | -4.11373 | 4.45E-17    |
| EPB72 (Affy - STOM)                        | X85116_rna1_s_at | 23021  | 56   | 0.1951   | 148 | 0.515949 | -2.64454 | 1.45E-10    |
| PSMB2                                      | D26599_at        | 32074  | 28   | 0.070016 | 150 | 0.375325 | -5.36055 | 4.16E-21    |
| YWHAB                                      | X57346_at        | 23392  | 22   | 0.075431 | 151 | 0.518059 | -6.86801 | 1.36E-24    |
| ARPC2                                      | U50523_at        | 31665  | 25   | 0.063322 | 154 | 0.390311 | -6.16392 | 1.35E-23    |
| AP3S1                                      | U91932_at        | 48911  | 25   | 0.040995 | 157 | 0.25761  | -6.284   | 2.67E-24    |
| CAPZA1                                     | U56637_at        | 41722  | 28   | 0.053825 | 159 | 0.305845 | -5.68219 | 3.77E-23    |
| XPO1                                       | Y08614_at        | 41558  | 35   | 0.067547 | 161 | 0.310914 | -4.60293 | 3.12E-20    |
| KPNA4                                      | AB002533_at      | 54873  | 41   | 0.059926 | 162 | 0.236933 | -3.95373 | 6.14E-18    |
| MGST2                                      | U77604_at        | 21484  | 218  | 0.813831 | 165 | 0.616366 | 1.32037  | 0.0106186   |
| CTNNB1                                     | X87838_at        | 26930  | 16   | 0.047652 | 172 | 0.51258  | -10.7568 | 6.61E-34    |
| CCND2                                      | D13639_at        | 25341  | 240  | 0.759592 | 175 | 0.554222 | 1.37056  | 0.00238468  |
| LASP1                                      | X82456_at        | 39094  | 53   | 0.108732 | 177 | 0.363356 | -3.34175 | 1.64E-16    |
| COPA                                       | U24105_at        | 39805  | 40   | 0.080596 | 193 | 0.389125 | -4.82807 | 6.99E-25    |
| LTA4H                                      | J03459_at        | 31502  | 37   | 0.094201 | 204 | 0.519711 | -5.51702 | 8.74E-29    |
| TAX1BP1                                    | U33821_at        | 53050  | 37   | 0.055938 | 206 | 0.311639 | -5.57111 | 3.07E-29    |
| WARS                                       | X59892_at        | 33170  | 54   | 0.130569 | 208 | 0.503254 | -3.8543  | 3.84E-22    |
| STAT3                                      | L29277_at        | 52703  | 41   | 0.062394 | 211 | 0.321304 | -5.14962 | 2.25E-28    |
| ANXA11                                     | L19605_at        | 44651  | 60   | 0.107774 | 215 | 0.386435 | -3.58562 | 2.69E-21    |
| TPR                                        | X66397_at        | 57098  | 38   | 0.053377 | 223 | 0.313439 | -5.87216 | 1.28E-32    |
| CLTC, CLTCL2 (Affy - Cltc)                 | D21260_at        | 62841  | 29   | 0.037012 | 232 | 0.296288 | -8.00509 | 4.61E-40    |
| PDLIM1                                     | U90878_at        | 49379  | 117  | 0.190036 | 233 | 0.378689 | -1.99272 | 9.84E-10    |
| ITGB1                                      | X07979_at        | 47927  | 38   | 0.063591 | 236 | 0.395186 | -6.21448 | 1.20E-35    |
| ADPRT (Affy - Parp1)                       | J03473_at        | 32281  | 49   | 0.121743 | 261 | 0.648878 | -5.32992 | 1.25E-35    |
| PSEN1                                      | L76517_at        | 46638  | 47   | 0.080826 | 278 | 0.478382 | -5.91866 | 1.54E-40    |
| VIL2 (Ezr)                                 | X51521_at        | 44651  | 113  | 0.202974 | 282 | 0.506859 | -2.49716 | 2.05E-17    |
| MLH1                                       | U07418_at        | 43382  | 42   | 0.077648 | 285 | 0.527236 | -6.79003 | 5.46E-45    |
| RPN2                                       | Y00282_at        | 47222  | 51   | 0.08662  | 297 | 0.504756 | -5.82724 | 8.40E-43    |
| APLP2                                      | L09209_s_at      | 62260  | 70   | 0.090174 | 301 | 0.387996 | -4.30274 | 9.88E-35    |
| ANXA2                                      | D00017_at        | 38104  | 357  | 0.751434 | 311 | 0.655027 | 1.14718  | 0.103877    |
| CAPN2                                      | M23254_at        | 50226  | 104  | 0.166073 | 316 | 0.504926 | -3.0404  | 1.74E-25    |
| PTDSS1                                     | D14694_at        | 64684  | 76   | 0.094234 | 338 | 0.419362 | -4.4502  | 6.01E-40    |
| GNB1                                       | X04526_at        | 67909  | 55   | 0.064957 | 363 | 0.428992 | -6.6042  | 4.54E-56    |
| NDRG1                                      | D87953_at        | 40325  | 784  | 1.55932  | 373 | 0.742342 | 2.10054  | 2.08E-33    |
| PRSS11 (Affy - Htra1)                      | D87258_at        | 49456  | 1673 | 2.71313  | 406 | 0.658835 | 4.11807  | 5.27E-180   |
| CAST                                       | D16217_at        | 113637 | 76   | 0.05364  | 415 | 0.293088 | -5.464   | 7.67E-57    |
| RES4-22 (Affy - C4orf8, aka mouse Fam193a) | AB000460_at      | 65607  | 49   | 0.059902 | 429 | 0.524779 | -8.76068 | 4.71E-76    |
| MYH9                                       | M31013_at        | 81528  | 90   | 0.088538 | 465 | 0.457737 | -5.16996 | 3.87E-61    |
| ABLIM (Affy - Ablim1)                      | D31883_at        | 85747  | 197  | 0.184264 | 513 | 0.48014  | -2.60572 | 9.59E-33    |



|                          |                |        |      |          |      |          |          |            |
|--------------------------|----------------|--------|------|----------|------|----------|----------|------------|
| IQGAP1                   | L33075_at      | 91750  | 253  | 0.221161 | 545  | 0.476716 | -2.15552 | 6.56E-25   |
| SPTBN1 (mouse - Spnb2)   | M96803_at      | 91416  | 77   | 0.067556 | 605  | 0.531132 | -7.86214 | 1.62E-101  |
| RBPMS                    | D84110_at      | 125886 | 177  | 0.112769 | 636  | 0.405461 | -3.59551 | 1.22E-60   |
| PIK4CA (Affy - PI4KA)    | L36151_at      | 125965 | 175  | 0.111425 | 799  | 0.509057 | -4.56862 | 1.04E-94   |
| NA (Affy - Cox10)        | U82010_rna1_at | 116845 | 173  | 0.118749 | 804  | 0.552224 | -4.65036 | 1.14E-96   |
| KIAA0864 (Affy - Mprrip) | D23673_at      | 118367 | 166  | 0.112479 | 951  | 0.644792 | -5.73256 | 7.34E-133  |
| NCOR2                    | U37146_at      | 162061 | 256  | 0.126694 | 953  | 0.471937 | -3.72503 | 1.39E-93   |
| ITPK1                    | U51336_at      | 136288 | 271  | 0.159479 | 993  | 0.584738 | -3.66654 | 6.72E-96   |
| NFIB                     | U85193_at      | 215137 | 278  | 0.103639 | 1038 | 0.387215 | -3.73619 | 3.93E-102  |
| KIAA0084 (Affy - Rftn1)  | D42043_at      | 197192 | 1324 | 0.538508 | 1479 | 0.601933 | -1.11778 | 0.00522762 |
| FYN                      | M14676_at      | 195577 | 1675 | 0.686895 | 1492 | 0.612238 | 1.12194  | 0.00205649 |

### No tags in starting material

|       |           |      |   |          |   |   |   |          |
|-------|-----------|------|---|----------|---|---|---|----------|
| RPL41 | Z12962_at | 1060 | 1 | 0.075664 | 0 | 0 | ? | 0.291999 |
| APEX  | D13370_at | 2119 | 0 | 0        | 0 | 0 |   | 1        |

### X linked

| Official symbol                  | Affymetrix Probe Set | Transcript Length | MacroH2A1 counts (Raw) | MacroH2A1 (RPKM) | Starting material counts (Raw) | Starting Material (RPKM) | MacroH2A1 content (macroH2A1 vs SM) | Stepup (p-value (macroH2A1 vs SM)) |
|----------------------------------|----------------------|-------------------|------------------------|------------------|--------------------------------|--------------------------|-------------------------------------|------------------------------------|
| UBE1 ( Affy says Uba1)           | M58028_at            | 24760             | 412                    | 1.33457          | 155                            | 0.502401                 | 2.65637                             | 4.48E-28                           |
| CETN2                            | X72964_at            | 4781              | 73                     | 1.22461          | 20                             | 0.335723                 | 3.64768                             | 1.49E-08                           |
| FLNA                             | X53416_at            | 23075             | 822                    | 2.85709          | 221                            | 0.768635                 | 3.71709                             | 4.59E-82                           |
| PGK1                             | V00572_at            | 16577             | 272                    | 1.316            | 94                             | 0.455084                 | 2.89178                             | 2.11E-21                           |
| GLA                              | U78027_rna3_at       | 12838             | 196                    | 1.22448          | 75                             | 0.468849                 | 2.61167                             | 7.61E-14                           |
| FHL1                             | U60115_at            | 61391             | 1200                   | 1.56772          | 394                            | 0.515064                 | 3.04375                             | 9.53E-95                           |
| USP11                            | U44839_at            | 16632             | 335                    | 1.61545          | 107                            | 0.516308                 | 3.12885                             | 1.18E-28                           |
| DXS1357E, SLC6A8 (Affy - Slc6a8) | U36341_rna1_at       | 9367              | 293                    | 2.50877          | 81                             | 0.693991                 | 3.61498                             | 1.46E-29                           |
| NONO                             | U02493_at            | 18944             | 262                    | 1.10923          | 93                             | 0.393986                 | 2.81541                             | 5.76E-20                           |
| ARAF1 (Affy - Araf)              | U01337_at            | 11980             | 212                    | 1.41929          | 79                             | 0.529224                 | 2.68184                             | 2.05E-15                           |
| MSN                              | M69066_at            | 72510             | 1401                   | 1.54965          | 464                            | 0.513558                 | 3.01748                             | 4.52E-109                          |
| TMSB4X                           | M17733_at            | 2126              | 21                     | 0.792226         | 11                             | 0.41524                  | 1.90788                             | 0.074929                           |
| RPL36A                           | M15661_at            | 2408              | 34                     | 1.13244          | 11                             | 0.366611                 | 3.08894                             | 0.000449                           |
| IRAK1                            | L76191_at            | 10005             | 269                    | 2.15639          | 88                             | 0.705887                 | 3.05487                             | 1.12E-22                           |
| PLP2                             | L09604_at            | 3164              | 32                     | 0.81116          | 12                             | 0.304379                 | 2.66497                             | 0.002146                           |
| SLC25A5                          | J02683_s_at          | 3156              | 40                     | 1.01652          | 5                              | 0.127146                 | 7.99491                             | 2.63E-08                           |
| RPL39                            | D79205_at            | 2666              | 39                     | 1.17327          | 13                             | 0.391339                 | 2.99809                             | 0.000228                           |
| KIA0026 (affy - Morf4l2)         | D14812_at            | 8204              | 63                     | 0.615897         | 27                             | 0.264124                 | 2.33185                             | 0.00012                            |

## Removed genes - no clear single mouse homologue or duplicate of gene included in analysis

| Official symbol                     | Affymetrix Probe Set |
|-------------------------------------|----------------------|
| KIAA0220 (Affy - Npipl3, aka Smg1?) | D86974_at            |
| PTMA                                | M14483_rna1_s_at     |
| HNRPA1                              | U00947_s_at          |
| HNRPA1                              | X04347_s_at          |
| NA                                  | Z70759_at            |
| D6S81E                              | Z37166_at            |
| NA                                  | X98482_r_at          |
| NA                                  | X83492_at            |
| DXS1357E                            | X81817_at            |
| SERPINA3                            | X68733_rna1_at       |
| HLA-E                               | X56841_at            |
| HLA-DPA1                            | X03100_cds2_at       |
| HLA-DRA                             | X00274_at            |
| TUBB                                | V00599_s_at          |
| TIF1B                               | U95040_at            |
| OS4                                 | U81556_at            |
| CHI3L2 no clear homologue in mouse  | U49835_s_at          |
| ZNF220                              | U47742_at            |
| MNPEP (no gene found)               | U29607_at            |
| NA                                  | U06155_s_at          |
| SERPINB6 (no clear homologue)       | S69272_s_at          |
| HLA-A                               | M94880_f_at          |
| HLA-DQA1                            | M34996_s_at          |
| HLA-DNA                             | M31525_at            |
| NA                                  | M13560_s_at          |
| SEZ23A (bad probe)                  | M11119_at            |
| H2AFO                               | L19779_at            |
| ZNF91                               | L11672_at            |
| HLA-DQB1                            | K02405_f_at          |
|                                     | HG987-HT987_at       |
|                                     | HG821-HT821_at       |
|                                     | HG662-HT662_at       |
|                                     | HG658-HT658_f_at     |
|                                     | HG613-HT613_at       |
|                                     | HG4542-HT4947_at     |
|                                     | HG4541-HT4946_s_at   |
|                                     | HG4319-HT4589_at     |
|                                     | HG4297-HT4567_at     |
|                                     | HG417-HT417_s_at     |
|                                     | HG384-HT384_at       |

|                                                      |                    |
|------------------------------------------------------|--------------------|
|                                                      | HG3597-HT3800_f_at |
|                                                      | HG3549-HT3751_at   |
|                                                      | HG3514-HT3708_at   |
|                                                      | HG33-HT33_at       |
|                                                      | HG3364-HT3541_at   |
| NA                                                   | HG3214-HT3391_at   |
|                                                      | HG311-HT311_at     |
|                                                      | HG3076-HT3238_s_at |
|                                                      | HG2917-            |
|                                                      | HT3061_f_at        |
|                                                      | HG2915-HT3059_f_at |
| NA                                                   | HG2873-HT3017_at   |
|                                                      | HG2855-HT2995_at   |
|                                                      | HG2815-            |
|                                                      | HT4023_s_at        |
|                                                      | HG2815-            |
|                                                      | HT2931_s_at        |
|                                                      | HG2788-HT2896_at   |
|                                                      | HG2639-            |
|                                                      | HT2735_s_at        |
|                                                      | HG2279-HT2375_at   |
|                                                      | HG2238-            |
|                                                      | HT2321_s_at        |
|                                                      | HG2167-HT2237_at   |
|                                                      | HG1980-HT2023_at   |
|                                                      | HG1862-HT1897_at   |
|                                                      | HG1800-HT1823_at   |
|                                                      | HG1515-            |
|                                                      | HT1515_f_at        |
|                                                      | HG1428-            |
|                                                      | HT1428_s_at        |
|                                                      | HG1322-            |
|                                                      | HT5143_s_at        |
|                                                      | HG1153-HT1153_at   |
|                                                      | HG1102-HT1102_at   |
| HLA-B                                                | D49824_s_at        |
| HIA-A                                                | D32129_f_at        |
| KIAA0102                                             | D14658_at          |
| NPIP (affy says<br>DKFZp547E087, probe<br>not great) | AC002045_xpt2_s_at |
| SLC25A6 (X-linked, not<br>mapped in mouse)           | J03592_at          |

---

<sup>1</sup>Housekeeping gene list is from L.L.Hsiao et. al. *Physiol Genomics*, 2001. 7(2): 97-104. In some cases gene identification was determined from the affymetrix probe set.

<sup>2</sup>Values were calculated using Partek Genomics Suite software.
