# Supplementary material
Source: PubMed Central journal article supplement (PMC2976432)
Supplement: supp_30_23_5473__3.pdf [file supp_30_23_5473__3.pdf]

Table 2, supplement. Relative macroH2A1 content of liver active genes in mouse liver.<sup>1</sup>

| Gene Symbol | Length | MacroH2A1 counts (Raw) | MacroH2A1 (RPKM) | Starting material counts (Raw) | Starting Material (RPKM) | macroH2A1 content (macroH2A vs SM) | stepup (p-value (MacroH2A vs SM)) |
|-------------|--------|------------------------|------------------|--------------------------------|--------------------------|------------------------------------|-----------------------------------|
| Serpina1d   | 10048  | 10                     | 0.07982          | 10                             | 0.079871                 | -1.00064                           | 1                                 |
| Fga         | 7466   | 5                      | 0.053712         | 23                             | 0.247235                 | -4.60293                           | 0.000700769                       |
| Fgb         | 7487   | 8                      | 0.085699         | 26                             | 0.278699                 | -3.25207                           | 0.00255774                        |
| Fgg         | 7155   | 8                      | 0.089675         | 36                             | 0.403796                 | -4.50286                           | 2.24E-05                          |
| Arg1        | 12265  | 22                     | 0.143863         | 49                             | 0.320626                 | -2.22869                           | 0.00196891                        |
| Alb         | 15716  | 27                     | 0.137789         | 47                             | 0.240008                 | -1.74185                           | 0.0283344                         |
| F12         | 8838   | 45                     | 0.408368         | 36                             | 0.326902                 | 1.2492                             | 0.376554                          |
| F11         | 20863  | 31                     | 0.119173         | 77                             | 0.296199                 | -2.48545                           | 1.37E-05                          |
| Asl         | 12830  | 15                     | 0.093769         | 59                             | 0.369058                 | -3.93584                           | 2.78E-07                          |
| F2          | 11096  | 32                     | 0.231301         | 52                             | 0.376103                 | -1.62603                           | 0.0406885                         |
| F7          | 9776   | 36                     | 0.295348         | 47                             | 0.385839                 | -1.30639                           | 0.279955                          |
| Trf         | 21412  | 31                     | 0.116117         | 92                             | 0.344826                 | -2.96963                           | 4.39E-08                          |
| F10         | 18910  | 29                     | 0.122998         | 97                             | 0.411671                 | -3.34696                           | 1.26E-09                          |
| Got1        | 24854  | 25                     | 0.080675         | 98                             | 0.316446                 | -3.9225                            | 2.84E-11                          |
| Serpinc1    | 24408  | 34                     | 0.111722         | 109                            | 0.358397                 | -3.20792                           | 3.33E-10                          |
| Pygl        | 36870  | 50                     | 0.108765         | 146                            | 0.317797                 | -2.92186                           | 7.01E-12                          |
| Cp          | 50557  | 58                     | 0.092011         | 197                            | 0.312719                 | -3.39871                           | 1.44E-18                          |
| Gys2        | 50498  | 73                     | 0.115942         | 203                            | 0.32262                  | -2.78259                           | 4.82E-15                          |
| Ass1        | 50402  | 100                    | 0.159128         | 224                            | 0.356673                 | -2.24143                           | 8.55E-12                          |
| F5          | 68417  | 219                    | 0.256728         | 344                            | 0.403519                 | -1.57178                           | 2.69E-07                          |

<sup>1</sup>Values were calculated using Partek Genomics Suite software.
