# Supplementary material
Source: PubMed Central journal article supplement (PMC2976432)
Supplement: supp_30_23_5473__4.pdf [file supp_30_23_5473__4.pdf]

Table 3, supplement. MacroH2A1 content of physiologically biased nervous system genes in mouse liver.<sup>1</sup>

| Gene Symbol | Length | macroH2A counts (Raw) <sup>2</sup> | macroH2A (RPKM) <sup>2</sup> | Starting material counts (Raw) <sup>2</sup> | Starting material (RPKM) <sup>2</sup> | macroH2A1 content (macroH2A vs SM) <sup>2</sup> | p-value (macroH2A vs SM) <sup>2</sup> |
|-------------|--------|------------------------------------|------------------------------|---------------------------------------------|---------------------------------------|-------------------------------------------------|---------------------------------------|
| Pdyn        | 1869   | 16                                 | 0.6866                       | 11                                          | 0.472338                              | 1.45362                                         | 0.335354                              |
| Drd4        | 2997   | 34                                 | 0.909883                     | 14                                          | 0.374896                              | 2.42703                                         | 0.003398                              |
| Chrm2       | 1606   | 14                                 | 0.699158                     | 15                                          | 0.749575                              | -1.07211                                        | 0.851326                              |
| Ptgds       | 3039   | 61                                 | 1.60987                      | 19                                          | 0.501756                              | 3.20848                                         | 1.48E-06                              |
| Aanat       | 3994   | 11                                 | 0.220891                     | 20                                          | 0.401875                              | -1.81934                                        | 0.103119                              |
| Nefl        | 3855   | 32                                 | 0.665762                     | 23                                          | 0.478821                              | 1.39042                                         | 0.224771                              |
| Zic5        | 6500   | 81                                 | 0.999459                     | 26                                          | 0.321018                              | 3.1134                                          | 5.22E-08                              |
| Npy5r       | 8131   | 36                                 | 0.355101                     | 27                                          | 0.266495                              | 1.33248                                         | 0.257082                              |
| Htr1a       | 4442   | 17                                 | 0.306947                     | 30                                          | 0.542016                              | -1.76583                                        | 0.056024                              |
| Kcnv1       | 8652   | 14                                 | 0.129779                     | 31                                          | 0.287551                              | -2.2157                                         | 0.010225                              |
| Drd1a       | 4476   | 45                                 | 0.806335                     | 33                                          | 0.591689                              | 1.36277                                         | 0.174264                              |
| Chrm4       | 7642   | 117                                | 1.22792                      | 34                                          | 0.35706                               | 3.43899                                         | 3.85E-12                              |
| Adcyap1     | 6069   | 31                                 | 0.409673                     | 35                                          | 0.462829                              | -1.12975                                        | 0.620529                              |
| Hrh3        | 4751   | 103                                | 1.73878                      | 36                                          | 0.608117                              | 2.85929                                         | 6.64E-09                              |
| Npy1r       | 9378   | 47                                 | 0.401958                     | 46                                          | 0.393656                              | 1.02109                                         | 0.919846                              |
| Kcns1       | 7496   | 126                                | 1.34814                      | 49                                          | 0.524609                              | 2.56979                                         | 3.27E-09                              |
| Npy2r       | 9704   | 53                                 | 0.438044                     | 60                                          | 0.496215                              | -1.1328                                         | 0.507909                              |
| Npy         | 6778   | 86                                 | 1.01763                      | 60                                          | 0.710427                              | 1.43242                                         | 0.031264                              |
| Gabra6      | 14616  | 43                                 | 0.235957                     | 61                                          | 0.334943                              | -1.41951                                        | 0.076272                              |
| Chrna6      | 10734  | 66                                 | 0.493146                     | 82                                          | 0.613087                              | -1.24321                                        | 0.18672                               |
| Mog         | 12660  | 111                                | 0.703206                     | 86                                          | 0.545173                              | 1.28988                                         | 0.07522                               |
| Htr6        | 13382  | 171                                | 1.02487                      | 100                                         | 0.59972                               | 1.70891                                         | 1.47E-05                              |
| Chrna3      | 15218  | 161                                | 0.848519                     | 113                                         | 0.595923                              | 1.42387                                         | 0.003708                              |
| Htr1d       | 20880  | 238                                | 0.914197                     | 135                                         | 0.518887                              | 1.76184                                         | 8.24E-08                              |
| Chrm1       | 19599  | 185                                | 0.757061                     | 137                                         | 0.560991                              | 1.34951                                         | 0.00749                               |
| Chrna4      | 16868  | 162                                | 0.770273                     | 143                                         | 0.680365                              | 1.13215                                         | 0.278927                              |
| Cnr1        | 24201  | 135                                | 0.447398                     | 152                                         | 0.504057                              | -1.12664                                        | 0.312897                              |
| Atp1a3      | 27730  | 307                                | 0.887936                     | 160                                         | 0.463063                              | 1.91753                                         | 7.19E-12                              |
| Chrb3       | 31020  | 134                                | 0.346462                     | 167                                         | 0.43206                               | -1.24706                                        | 0.056195                              |
| Chrna5      | 26901  | 254                                | 0.757283                     | 170                                         | 0.507166                              | 1.49317                                         | 4.38E-05                              |
| Sema4f      | 27867  | 390                                | 1.12245                      | 184                                         | 0.529904                              | 2.11822                                         | 3.70E-18                              |
| Chrb4       | 20390  | 300                                | 1.18004                      | 187                                         | 0.736027                              | 1.60326                                         | 2.79E-07                              |
| Dbh         | 17699  | 385                                | 1.74464                      | 187                                         | 0.847935                              | 2.05751                                         | 6.39E-17                              |
| Pnoc        | 24538  | 394                                | 1.28781                      | 199                                         | 0.650854                              | 1.97864                                         | 6.74E-16                              |
| Slc6a4      | 33748  | 427                                | 1.01478                      | 204                                         | 0.485123                              | 2.0918                                          | 3.06E-19                              |
| Rtn4r       | 24704  | 546                                | 1.77263                      | 210                                         | 0.682215                              | 2.59835                                         | 1.83E-35                              |
| Gabra1      | 51452  | 135                                | 0.210438                     | 222                                         | 0.346274                              | -1.64549                                        | 3.59E-06                              |
| Cplx1       | 31475  | 380                                | 0.968302                     | 264                                         | 0.673144                              | 1.43848                                         | 4.75E-06                              |
| Slc6a1      | 34891  | 473                                | 1.08728                      | 272                                         | 0.625641                              | 1.73786                                         | 1.35E-13                              |
| Drd3        | 60599  | 419                                | 0.554551                     | 336                                         | 0.444983                              | 1.24623                                         | 0.00257                               |
| Gad1        | 39850  | 390                                | 0.784927                     | 336                                         | 0.676676                              | 1.15998                                         | 0.045881                              |
| Gabrg2      | 88823  | 203                                | 0.183301                     | 342                                         | 0.309008                              | -1.6858                                         | 2.04E-09                              |
| Slc6a2      | 40622  | 578                                | 1.14119                      | 344                                         | 0.679621                              | 1.67916                                         | 1.00E-14                              |
| Gabra4      | 88576  | 200                                | 0.181095                     | 367                                         | 0.332521                              | -1.83617                                        | 1.51E-12                              |
| Crhr1       | 42638  | 617                                | 1.1606                       | 374                                         | 0.703954                              | 1.64868                                         | 9.28E-15                              |
| Slc6a3      | 41927  | 355                                | 0.679091                     | 382                                         | 0.731205                              | -1.07674                                        | 0.315713                              |

|         |         |      |          |      |          |          |           |
|---------|---------|------|----------|------|----------|----------|-----------|
| Kcnq2   | 38986   | 515  | 1.05948  | 386  | 0.794599 | 1.33335  | 1.74E-05  |
| Snap25  | 68980   | 324  | 0.376717 | 411  | 0.478176 | -1.26933 | 0.001276  |
| Gabra2  | 134794  | 239  | 0.142207 | 422  | 0.251253 | -1.76682 | 7.35E-13  |
| Htr2a   | 66021   | 467  | 0.56732  | 431  | 0.52392  | 1.08284  | 0.233276  |
| Gria2   | 117857  | 332  | 0.225931 | 487  | 0.331622 | -1.4678  | 5.28E-08  |
| Drd2    | 66554   | 816  | 0.983352 | 600  | 0.723513 | 1.35913  | 9.50E-09  |
| Chrna7  | 113836  | 412  | 0.290276 | 753  | 0.530866 | -1.82883 | 7.13E-24  |
| Gabrb2  | 212836  | 504  | 0.189923 | 848  | 0.319757 | -1.68361 | 4.56E-21  |
| Htr4    | 143600  | 632  | 0.352985 | 900  | 0.502988 | -1.42496 | 6.11E-12  |
| Grm3    | 240118  | 524  | 0.175025 | 1083 | 0.361971 | -2.06811 | 3.57E-45  |
| Slit1   | 143600  | 1920 | 1.07236  | 1122 | 0.627058 | 1.71014  | 7.15E-48  |
| Sh3gl2  | 183925  | 823  | 0.358882 | 1158 | 0.505286 | -1.40794 | 4.06E-14  |
| Oprm1   | 249610  | 1074 | 0.345092 | 1353 | 0.435016 | -1.26058 | 1.31E-08  |
| Grm5    | 550903  | 1068 | 0.155485 | 1656 | 0.241243 | -1.55155 | 9.63E-30  |
| Dync1i1 | 302402  | 1525 | 0.404463 | 1949 | 0.517246 | -1.27885 | 5.15E-13  |
| Grm1    | 393576  | 1655 | 0.337258 | 2116 | 0.431476 | -1.27936 | 4.85E-14  |
| Chrm3   | 484192  | 3003 | 0.497429 | 2679 | 0.444043 | 1.12023  | 1.91E-05  |
| Grin2a  | 414848  | 3112 | 0.60165  | 3074 | 0.594681 | 1.01172  | 0.646867  |
| Cadps   | 450518  | 2581 | 0.459483 | 3221 | 0.573784 | -1.24876 | 3.31E-17  |
| Grik4   | 423937  | 7126 | 1.34815  | 3775 | 0.714636 | 1.88648  | 3.21E-229 |
| Nrxn1   | 1059154 | 1928 | 0.145996 | 4195 | 0.317865 | -2.17721 | 2.81E-189 |

### X-linked

|              |        |      |          |     |          |         |          |
|--------------|--------|------|----------|-----|----------|---------|----------|
| Plp1         | 14908  | 301  | 1.61935  | 120 | 0.645998 | 2.50674 | 3.22E-19 |
| Aldp (Abcd1) | 21692  | 519  | 1.91894  | 166 | 0.614155 | 3.12452 | 2.19E-43 |
| Gabra3       | 223572 | 1573 | 0.564293 | 678 | 0.243378 | 2.31858 | 1.97E-81 |
| Htr2c        | 234766 | 1533 | 0.523721 | 675 | 0.230748 | 2.26967 | 2.58E-76 |

### No clear single mouse homologue

Tgif  
Twist  
Gpr51

### Has liver EST in unigene database<sup>3</sup>

|          |       |     |          |     |          |          |          |
|----------|-------|-----|----------|-----|----------|----------|----------|
| Chrm5    | 1747  | 23  | 1.05591  | 15  | 0.689077 | 1.53236  | 0.193365 |
| Rab3a    | 4009  | 6   | 0.120035 | 18  | 0.360335 | -3.00191 | 0.012165 |
| Tpp1     | 7362  | 7   | 0.07626  | 30  | 0.327036 | -4.28844 | 8.63E-05 |
| Penk     | 4911  | 26  | 0.424616 | 33  | 0.539279 | -1.27004 | 0.360277 |
| Gfap     | 9866  | 158 | 1.28443  | 83  | 0.67516  | 1.9024   | 1.13E-06 |
| Shh      | 10263 | 74  | 0.578296 | 54  | 0.422269 | 1.3695   | 0.077094 |
| Homer3   | 11363 | 88  | 0.62113  | 55  | 0.388454 | 1.59898  | 0.005635 |
| Slc25a19 | 13158 | 17  | 0.103622 | 56  | 0.341561 | -3.29622 | 2.75E-06 |
| Eno2     | 9456  | 131 | 1.11111  | 58  | 0.492255 | 2.25718  | 7.64E-08 |
| Htr2b*   | 12935 | 9   | 0.055804 | 77  | 0.477742 | -8.561   | 4.18E-15 |
| Chrna2   | 11990 | 122 | 0.816082 | 101 | 0.676039 | 1.20715  | 0.160749 |
| Chrm2    | 11186 | 148 | 1.06116  | 97  | 0.695931 | 1.5248   | 0.001094 |
| Ppt1     | 22935 | 29  | 0.101413 | 127 | 0.4444   | -4.3821  | 3.51E-16 |
| Bche     | 72608 | 48  | 0.053021 | 185 | 0.204483 | -3.85662 | 1.73E-20 |
| Stx1a    | 27529 | 403 | 1.17411  | 162 | 0.472274 | 2.48607  | 7.32E-25 |
| Adora1   | 36211 | 188 | 0.4164   | 250 | 0.554076 | -1.33063 | 0.002938 |

|        |        |      |          |      |          |          |           |
|--------|--------|------|----------|------|----------|----------|-----------|
| Homer1 | 96930  | 84   | 0.069505 | 439  | 0.363476 | -5.22952 | 1.98E-59  |
| Stxbp1 | 59627  | 245  | 0.329546 | 376  | 0.506074 | -1.53567 | 1.26E-07  |
| Homer2 | 92485  | 227  | 0.196856 | 555  | 0.481605 | -2.44649 | 9.10E-33  |
| Mbp    | 110516 | 965  | 0.700318 | 853  | 0.619432 | 1.13058  | 0.008948  |
| Slc1a2 | 132103 | 2707 | 1.6435   | 987  | 0.599617 | 2.74091  | 7.43E-183 |
| App    | 219278 | 402  | 0.147036 | 1185 | 0.433703 | -2.94964 | 6.53E-90  |

<sup>1</sup> Genes are from the physiologically biased nervous system gene list in S. Dorus et. al. Cell, 2004. 119(7): 1027-40.

<sup>2</sup> Values were calculated using Partek Genomics Suite software.

<sup>3</sup> Some ESTs were from fetal liver or gall bladder, which may not indicate expression in adult hepatocytes.

\* No liver ESTs, but in intron of Psm1, which is expressed in liver.
