# Supplementary material
Source: PubMed Central journal article supplement (PMC2976432)
Supplement: supp_30_23_5473__5.pdf [file supp_30_23_5473__5.pdf]

Table 4, supplement. X-linked genes showing depletion of macroH2A1 in mouse liver<sup>1</sup>

| Start     | Stop      | Gene Symbol   | Length | MacroH2A counts (Raw) | macroH2A (RPKM) <sup>2</sup> | Starting material counts (Raw) | Starting material (RPKM) | Relative macroH2A content | stepup (p-value (MacroH2A vs SM)) | Comments         |
|-----------|-----------|---------------|--------|-----------------------|------------------------------|--------------------------------|--------------------------|---------------------------|-----------------------------------|------------------|
| 99696294  | 99709144  | 2010000I03Rik | 12851  | 8                     | 0.049928                     | 58                             | 0.36221                  | -7.25462                  | 1.70E-10                          | a.k.a. Jpx       |
| 143560897 | 143767814 | Ott           | 206918 | 1                     | 0.000388                     | 6                              | 0.002327                 | -6.00382                  | 0.0651274                         |                  |
| 147573945 | 147615070 | Kdm5c         | 41126  | 38                    | 0.074107                     | 223                            | 0.435169                 | -5.87216                  | 1.28E-32                          | * a.k.a. Jarid1c |
| 48986958  | 48987040  | Mir18b        | 83     | 1                     | 0.966307                     | 4                              | 3.86769                  | -4.00255                  | 0.209488                          |                  |
| 90441427  | 90465370  | Eif2s3x       | 23944  | 33                    | 0.110538                     | 115                            | 0.385452                 | -3.48707                  | 1.16E-11                          | *                |
| 99763628  | 99826473  | B230206F22Rik | 62846  | 92                    | 0.11741                      | 310                            | 0.395871                 | -3.37171                  | 3.11E-28                          | a.k.a. Ftx       |
| 101243572 | 101272843 | 5530601H04Rik | 29272  | 58                    | 0.158916                     | 161                            | 0.441411                 | -2.77763                  | 3.66E-12                          | *                |
| 57152030  | 57154095  | Sox3          | 2066   | 3                     | 0.116462                     | 7                              | 0.271918                 | -2.33482                  | 0.249185                          |                  |
| 99663091  | 99685952  | Xist          | 22862  | 55                    | 0.192949                     | 100                            | 0.351039                 | -1.81934                  | 0.000480914                       | *                |
| 130555050 | 130557051 | Tceal6        | 2002   | 5                     | 0.200308                     | 9                              | 0.360785                 | -1.80115                  | 0.338132                          |                  |
| 132273688 | 132274737 | 1700014N06Rik | 1050   | 4                     | 0.305537                     | 7                              | 0.53503                  | -1.75111                  | 0.424432                          |                  |
| 101282493 | 101287905 | 2610029G23Rik | 5413   | 11                    | 0.162985                     | 19                             | 0.281699                 | -1.72837                  | 0.182629                          | *                |
| 122280056 | 122283460 | 4932411N23Rik | 3405   | 12                    | 0.282655                     | 19                             | 0.447823                 | -1.58434                  | 0.257237                          |                  |
| 90977287  | 90982910  | Zxdb          | 5624   | 9                     | 0.128348                     | 14                             | 0.19978                  | -1.55655                  | 0.353179                          |                  |
| 12437980  | 12450942  | Ddx3x         | 12963  | 20                    | 0.123742                     | 31                             | 0.191922                 | -1.55099                  | 0.15883                           | * a.k.a. Ddx     |
| 101323114 | 101326630 | Magee1        | 3517   | 17                    | 0.387677                     | 23                             | 0.524838                 | -1.3538                   | 0.40174                           |                  |
| 17319625  | 17436317  | Kdm6a         | 116693 | 225                   | 0.154643                     | 287                            | 0.197382                 | -1.27637                  | 0.00934463                        | * a.k.a. Utx     |
| 118511503 | 118514329 | Nap1l3        | 2827   | 13                    | 0.368817                     | 15                             | 0.425829                 | -1.15458                  | 0.765849                          |                  |
| 8728918   | 8729350   | Gm5132        | 433    | 5                     | 0.926137                     | 5                              | 0.926727                 | -1.00064                  | 1                                 |                  |
| 152910223 | 152913090 | Yy2           | 2868   | 15                    | 0.419474                     | 14                             | 0.391759                 | 1.07075                   | 0.907376                          |                  |
| 15679839  | 15680555  | Cypt7/Cypt8   | 717    | 14                    | 1.56604                      | 13                             | 1.4551                   | 1.07624                   | 0.902206                          |                  |
| 122507566 | 122531581 | Gm382         | 24016  | 61                    | 0.203715                     | 56                             | 0.187136                 | 1.08859                   | 0.711415                          |                  |
| 148376881 | 148378279 | Mageh1        | 1399   | 12                    | 0.68795                      | 11                             | 0.631022                 | 1.09021                   | 0.890097                          |                  |
| 120244282 | 120252854 | Vmn2r121      | 8573   | 31                    | 0.290016                     | 28                             | 0.262117                 | 1.10644                   | 0.76052                           |                  |
| 105399474 | 105403164 | Gm6377        | 3691   | 14                    | 0.304213                     | 12                             | 0.26092                  | 1.16592                   | 0.758552                          |                  |
| 150289178 | 150290285 | Magea3        | 1108   | 7                     | 0.506701                     | 6                              | 0.434591                 | 1.16592                   | 0.839567                          |                  |
| 69486795  | 69495850  | Xlr4c         | 9056   | 13                    | 0.115133                     | 11                             | 0.097482                 | 1.18107                   | 0.746778                          |                  |
| 74990481  | 74992129  | Fam47a        | 1649   | 16                    | 0.778202                     | 13                             | 0.632692                 | 1.22999                   | 0.643044                          |                  |

<sup>1</sup>MacroH2A1 content was analyzed using Partek Genomic Suite using build 36 of the mouse genomic database. Duplicate gene entries were removed.

\* Genes that escape X inactivation in Patski cells ([1] and present study).

1. Yang, F., T. Babak, J. Shendure, and C.M. Disteche, *Global survey of escape from X inactivation by RNA-sequencing in mouse*. *Genome Res.* **20**(5): p. 614-22.
