# Supplementary material
Source: PubMed Central journal article supplement (PMC2976432)
Supplement: supp_30_23_5473__6.pdf [file supp_30_23_5473__6.pdf]

**Table 5, supplement. Primer list**

| <b>Location</b> | <b>Forward Primer</b>   | <b>Reverse Primer</b>    | <b>Size (bp)</b> | <b>Annealing temp</b> |
|-----------------|-------------------------|--------------------------|------------------|-----------------------|
| <b>Jarid</b>    |                         |                          |                  |                       |
| -11,995         | CTTCGCCATAGGCTAGAAGG    | CAACACTTGGCTCACAGTAAGG   | 52               | 64 <sup>0</sup> C     |
| -7,860          | TATGAGAGTGGCAGGAGTGC    | ACCTCCAGGATGTGAACTGG     | 54               | 64 <sup>0</sup> C     |
| -2,575          | GGCACTGGGTTATCCCTACC    | CCACACCCCTCATCTCTGTAGC   | 71               | 64 <sup>0</sup> C     |
| -739            | ATGCTGATGGCCAATGATAC    | AGAAGCTTCAGTCCCACGTAGAG  | 65               | 64 <sup>0</sup> C     |
| 2,310           | TGGAGGACAGGGTAGTTAATGG  | CGAATGTGGTGACAAACAGG     | 72               | 64 <sup>0</sup> C     |
| 12,844          | CTATTTAGGGCCATGAACAACC  | TCCAGACAATATCCCGTTCC     | 76               | 64 <sup>0</sup> C     |
| 23,670          | TGGGAGACACCATAGAACAGC   | GGTCCAGATAACGCAAATCC     | 56               | 64 <sup>0</sup> C     |
| 33,517          | AAGTGTACTCTGCGCTGTGC    | AGCTCATCCAAGGTGTACCG     | 52               | 64 <sup>0</sup> C     |
| 39,013          | GAGGAGCCATTATTGACATGG   | AGGGCTCTCTGCCTACTTGG     | 51               | 64 <sup>0</sup> C     |
| 43,136          | GAGGGTGGGAATCTTGTATGG   | CAGTGTAGGGCTGGAAATGC     | 68               | 64 <sup>0</sup> C     |
| 49,527          | CAGCGGTGGTTACAGTGTAGG   | GCCTCCTTGCTTCTACATGG     | 54               | 64 <sup>0</sup> C     |
| 58,938          | GCCTGTCTAAACGTGTTCTATGC | GTATGTGGCTGCAGTTCTCG     | 70               | 64 <sup>0</sup> C     |
| 65,265          | AGCAAAGGTGCTAAGCAAGG    | GGCTGTCCAGATAGCAGAGC     | 50               | 64 <sup>0</sup> C     |
| 75,982          | GCAGGCCAAAGTCTATACCC    | GCTGTTTGGAGCCATAGCC      | 68               | 64 <sup>0</sup> C     |
| <b>Eif2s3x</b>  |                         |                          |                  |                       |
| -27,009         | CCCTGGCCTTTAGAGATTGC    | TTCCCAAATGAGACTGTTCC     | 57               | 64 <sup>0</sup> C     |
| -22,542         | AGTCCTGGGAAAGAAGACAGC   | AGCCCAACTGTTTGGACTCG     | 51               | 64 <sup>0</sup> C     |
| -17,609         | ATTTCCCTCACTGCTCATCC    | CAGGGAAACAACGTAAAGATCC   | 69               | 64 <sup>0</sup> C     |
| -11,641         | CCAAATTCCAGAGGTGTTTAGG  | CCAAGGGTCCATTGTGTCC      | 68               | 64 <sup>0</sup> C     |
| -7,658          | CTCCCTCAGCTTTGAATTGG    | AAGCCCAGTGTTTCATATGTGG   | 65               | 64 <sup>0</sup> C     |
| -3,696          | TTGGTAATCCTGGCTGATCTTAC | AAATATAGCTGGCCATGGTG     | 79               | 64 <sup>0</sup> C     |
| -2,606          | TGGGCATGTATATAGCTTAGTGG | TGATGGTACTGGTGATCTGAGC   | 82               | 64 <sup>0</sup> C     |
| -1,899          | GGCCTCACAAATGCTCTATTG   | CCAGGCAGGAACTCAGAAAAG    | 59               | 64 <sup>0</sup> C     |
| 155             | CCTGGAGATGAGGTGGTTCC    | TCTAGGATGGCTCCTTCAGC     | 58               | 64 <sup>0</sup> C     |
| 7,712           | GCAGGATAACCATTTCTTTCG   | GAAAGGCCAGGACTAATTTGC    | 70               | 64 <sup>0</sup> C     |
| 10,021          | GACCAACAGGGAATTTGAAGG   | AAACTGCACCACCTCAACAGC    | 50               | 64 <sup>0</sup> C     |
| 21,546          | CTTGTCATGCTATTTCAGCATCC | TCTCCGTAAAAGAAAGCTTAGACC | 75               | 64 <sup>0</sup> C     |
| 28,232          | GACTGAGCCCATCATTGTCC    | AGTGCACCTTCAGTACAGCTTGC  | 50               | 64 <sup>0</sup> C     |
| 30,936          | CAGAACTTGGTGATATCTTGTCG | TACTTGCTTTCTTGGTTGTGTGC  | 73               | 64 <sup>0</sup> C     |
| 33,961          | ACAGCCCATGTGAATGTCC     | GCTTCAGAGTCTCCTCCAACC    | 55               | 64 <sup>0</sup> C     |
| 38,904          | ACAGAGCAGGCACAAATGC     | TTCTCTAGTGCAGCCTGAAGC    | 70               | 64 <sup>0</sup> C     |
| 44,905          | GACCCAATAGCCTTGTAACAGC  | GTCATGTGGCTAAGAACTTGC    | 77               | 64 <sup>0</sup> C     |

**Krt1-23**

|        |                        |                      |    |                   |
|--------|------------------------|----------------------|----|-------------------|
| 579    | GAACCAGACTGTGTGCATGG   | TGGGTGAGCAGTACTTGAGC | 72 | 64 <sup>0</sup> C |
| 2,011  | TGCGTGATACCAACTCAATAGC | TCCATGGGACTAAGACATGC | 60 | 64 <sup>0</sup> C |
| 4,496  | TGTGAGTCCTTGCTCTGATCC  | TCGTTGGAGGTGTTTGAGC  | 65 | 64 <sup>0</sup> C |
| 9,468  | GCCTTCCATGACCTTGTCC    | TGAGTGATGGCCTTGATCG  | 64 | 64 <sup>0</sup> C |
| 11,673 | CATTGCTCATCTTGCATTCC   | GTGGTCTGATGGAGTGATGC | 80 | 64 <sup>0</sup> C |
| 14,853 | ACCAGTGACCTCTCCGATGG   | TGAGTGATGGCCTTGATCG  | 66 | 64 <sup>0</sup> C |

**Primers for sequence analysis**

| Gene                 | Forward Primer       | Reverse Primer        | Size (bp) | Annealing temp    |
|----------------------|----------------------|-----------------------|-----------|-------------------|
| <i>5530601H04Rik</i> | CCCAGCTTACTTTGCCTTTG | GTGCTGTAACTGGGCATCT   | 474       | 55 <sup>0</sup> C |
| <i>2610029G23Rik</i> | CTTTGGTTCAGTGATGCCCT | TCAGCCTCTCAGGTATTGGAA | 441       | 55 <sup>0</sup> C |
| <i>Magee1</i>        | CCCATCATAATGGAGGGATG | AGATGGATCCTTGGCCTTTT  | 405       | 55 <sup>0</sup> C |

**Primers used for gene expression**

|                      |                         |                       |     |                   |
|----------------------|-------------------------|-----------------------|-----|-------------------|
| <i>Raet1e</i>        | AGGATCCTACCTCAGCAGACC   | CATCCACTGAGCACTTCACG  | 54  | 64 <sup>0</sup> C |
| <i>Vldlr</i>         | CTCTGGAGTTCCTAGCTCATCC  | GACGCGATCCTCAAATATGG  | 53  | 64 <sup>0</sup> C |
| <i>Abcc4</i>         | AGGAGCTTCAACGGTACTGG    | CTTCCTCGAGTCCTTCTTGG  | 59  | 64 <sup>0</sup> C |
| <i>Abcc4</i>         | CTTCCTAGGACCTGTTGTACTCC | ACCCTGACATAGACCCTTGC  | 81  | 64 <sup>0</sup> C |
| <i>Acot1</i>         | TCAAGGGCTGGGAATGG       | TCGCAGCTGGATTGAACC    | 77  | 64 <sup>0</sup> C |
| <i>BC020535</i>      | AGAATCGCTCCACCTACTGG    | ATCCAAGAACCTGGTGTTC   | 206 | 64 <sup>0</sup> C |
| <i>Spsb4</i>         | AAGCCAGCCCTTGATGG       | AATGGAGGACAGTCTCTCTGC | 65  | 64 <sup>0</sup> C |
| <i>Acot2</i>         | AAGTGCCTATGAAGGACTGAGG  | CGAATGCATTACCACCAAGC  | 51  | 64 <sup>0</sup> C |
| <i>Tmem98</i>        | CCATGTATCTTCCGCTTTCC    | TGACTTCGCATTTCCCTCAGC | 54  | 64 <sup>0</sup> C |
| <i>Tcp1112</i>       | AGTGGCATTGGAGATGTGG     | GGATGCAGTCTAGGGACAGG  | 51  | 64 <sup>0</sup> C |
| <i>8430408G22Rik</i> | GGGCAATTCTAGTGAGACC     | TGGGAGCTAGACTGTTCATCG | 54  | 64 <sup>0</sup> C |
| <i>Mysm1</i>         | AAGGAAGGCGCTAGAGAAGC    | CACCAGATTAAGTGCCCTTGC | 204 | 64 <sup>0</sup> C |
| <i>Klh124</i>        | GTTTCGCTGACCTGTGATGC    | GCACTAGATGTGGCAAGAAGC | 63  | 64 <sup>0</sup> C |
| <i>Lpin1</i>         | ACTTGCTCCATAGTAACATGTCC | CAGAAGCCTGTCTCAGATGC  | 84  | 64 <sup>0</sup> C |
